# Supplementary material
Source: Research Square preprint supplement (doi:10.21203/rs.3.rs-9632764/v1)
Supplement: Supplementary file 1 [file 240065b88e55219549cbf867.docx]

**Variable definitions, coding schemes, and any transformations applied:** The study employs monthly time-series data covering the period January 2000 to December 2024. The empirical analysis is based on four principal variables and one event-based dummy variable.

**1. Variable Definitions**

| **Variable** | **Definition** | **Unit/Measurement** | **Source** |
| --- | --- | --- | --- |
| OP | Global crude oil price (Brent benchmark) | USD per barrel | U.S. Energy Information Administration (EIA) |
| GPR | Geopolitical Risk Index | Index value | Caldara and Iacoviello Geopolitical Risk Database |
| SUP | Global oil supply | Million barrels per day (mb/d) | International Energy Agency (IEA) |
| DEM | Global oil demand | Million barrels per day (mb/d) | International Energy Agency (IEA) |
| DUMMY | Strait of Hormuz geopolitical disruption indicator | Binary (0/1) | Author coding based on major geopolitical events |

**Coding Scheme for Dummy Variable:** The dummy variable was constructed to identify major geopolitical disruptions associated with the Strait of Hormuz and nearby Gulf maritime routes.

| Event Type | Coding |
| --- | --- |
| Major geopolitical disruption month | 1 |
| Non-event month | 0 |

The following major events were coded as disruption periods:

- Iraq War escalation (2003)
- Iran nuclear tensions (2008–2012)
- Tanker attacks in the Gulf of Oman (2019)
- U.S.–Iran military escalation (2020)
- Regional maritime security incidents (2024)

**Data Frequency and Structure**

- Frequency: Monthly
- Sample Period: January 2000 – December 2024
- Number of observations: 300
- Data structure: Balanced time-series dataset

**Data Transformations Applied**

Several transformations were applied prior to econometric estimation to ensure statistical validity and model stability.

**(a) Logarithmic Transformation**

The variables OP, SUP, and DEM were transformed into natural logarithms:

ln(OP), ln(SUP), ln(DEM)

Purpose:

- Stabilization of variance
- Reduction of heteroskedasticity
- Elasticity interpretation of coefficients
- Improved normality properties

**(b) First Differencing**

Non-stationary variables identified through Augmented Dickey-Fuller (ADF) and Phillips-Perron (PP) tests were transformed into first differences:

Δln(OP), Δln(SUP), Δln(DEM), ΔGPR

Purpose:

- Elimination of unit roots
- Achievement of stationarity
- Avoidance of spurious regression

**(c) Standardization of Geopolitical Risk Index**

The GPR index was normalized where necessary to facilitate comparability across periods.

**(d) Lag Structure**

Optimal lag lengths for VAR/VECM estimation were selected using:

- Akaike Information Criterion (AIC)
- Schwarz Bayesian Criterion (SBC/BIC)
- Hannan-Quinn Criterion (HQ)

The selected lag order for the baseline specification was two monthly lags.

**Stationarity Testing**

The following unit root tests were employed:

- Augmented Dickey-Fuller (ADF)
- Phillips-Perron (PP)

All variables were found to be integrated of order one [I(1)].

**Cointegration Testing**

Long-run equilibrium relationships among OP, GPR, SUP, and DEM were examined using the Johansen cointegration procedure.

Both Trace and Maximum Eigenvalue statistics confirmed the existence of cointegrating relationships.

**Formulae, statistical code, and scripts used for data processing and analysis:** The study employed Vector Autoregression (VAR), Vector Error Correction Model (VECM), and GARCH(1,1) methodologies to estimate both short-run dynamics and long-run volatility relationships.

**1. Econometric Specifications**

**(a) Baseline Functional Relationship**

OP_t = f(SUP_t, DEM_t, GPR_t, DUMMY_t)

Where:

- OP_t = oil prices
- SUP_t = global oil supply
- DEM_t = global oil demand
- GPR_t = geopolitical risk index
- DUMMY_t = Strait-specific disruption variable

**Vector Autoregression (VAR) Model**: The unrestricted VAR(p) specification is:

Y_t = A_1Y_(t-1) + A_2Y_(t-2) + ... + A_pY_(t-p) + ε_t

Where:

- Y_t = vector of endogenous variables
- A_i = coefficient matrices
- ε_t = white noise disturbance term

The vector Y_t includes:

Y_t = [OP_t, GPR_t, SUP_t, DEM_t]

**Vector Error Correction Model (VECM):** Because the variables were cointegrated, the following VECM specification was estimated:

ΔY_t = ΠY_(t-1) + ΣΓ_iΔY_(t-i) + ε_t

Where:

- Π = long-run equilibrium matrix
- Γ_i = short-run dynamic adjustment coefficients
- ε_t = innovation term

The error correction term (ECT) measures the speed of adjustment toward long-run equilibrium.

Estimated ECT coefficient:

ECT(-1) = -0.28***

This implies that approximately 28% of disequilibrium is corrected within one period.

**GARCH(1,1) Volatility Model:** Conditional variance equation:

σ_t² = α_0 + α_1ε_(t-1)² + β_1σ_(t-1)²

Estimated coefficients:

- α_0 = 0.0021
- α_1 = 0.31***
- β_1 = 0.64***

Interpretation:

- α_1 captures short-run volatility persistence
- β_1 captures long-run volatility clustering

The sum α_1 + β_1 = 0.95 indicates strong volatility persistence in oil markets.

**Impulse Response Functions (IRFs):** Impulse response analysis was performed to evaluate the dynamic reaction of oil prices to one-standard-deviation shocks in geopolitical risk.

The findings indicate:

- Immediate positive oil price response
- Peak response within 2–3 months
- Gradual decline over time

**Forecast Error Variance Decomposition (FEVD):** FEVD analysis was conducted to determine the proportion of oil price variation attributable to each structural shock.

At 12-month horizon:

| Shock Source | Contribution (%) |
| --- | --- |
| Geopolitical Risk | 28.7 |
| Oil Supply | 15.3 |
| Oil Demand | 22.1 |
| Own Shock | 33.9 |

**Statistical Software and Scripts:** The empirical analysis was conducted using:

- EViews 13
- Stata 18
- R (supplementary diagnostics)

**Representative EViews Commands**

**Unit Root Test**

adf op adf gpr adf sup adf dem

**Johansen Cointegration**

johansen op gpr sup dem

**VAR Estimation**

var op gpr sup dem

**VECM Estimation**

vec op gpr sup dem

**GARCH Estimation**

arch op c garch(1) arch(1)

**Representative R Code**

library(vars)

library(urca)

library(tseries)

library(rugarch)

# Unit Root Tests

adf.test(OP)

adf.test(GPR)

# VAR Model

var_model <- VAR(data, p = 2, type = "const")

# Johansen Cointegration

johansen_test <- ca.jo(data, type = "trace", K = 2)

# VECM

vecm_model <- cajorls(johansen_test, r = 1)

# GARCH Model

spec <- ugarchspec(

variance.model = list(model = "sGARCH", garchOrder = c(1,1)),

mean.model = list(armaOrder = c(1,0))

garch_fit <- ugarchfit(spec = spec, data = OP)

**Additional documentation required to enable editors and referees to verify and fully scrutinise methods and findings:** The following additional documentation is provided to ensure transparency, replicability, and methodological scrutiny:

**1. Data Availability**

The dataset used in the analysis was compiled from publicly accessible secondary sources:

- U.S. Energy Information Administration (EIA)
- International Energy Agency (IEA)
- Caldara and Iacoviello Geopolitical Risk Database

A reconstructed monthly dataset covering 2000–2024 has been prepared and supplied in spreadsheet format for replication purposes.

**2. Replication Material**

The following materials are supplied:

- Raw and processed datasets
- Variable definitions and coding framework
- Econometric model specifications
- Statistical commands and scripts
- Diagnostic test outputs
- Robustness checks
- Impulse response and variance decomposition outputs

**Diagnostic Tests Conducted:**To ensure model adequacy, the following diagnostics were performed:

| Diagnostic Test | Purpose |
| --- | --- |
| LM Serial Correlation Test | Residual autocorrelation |
| ARCH Heteroskedasticity Test | Conditional heteroskedasticity |
| Jarque-Bera Test | Residual normality |
| CUSUM Test | Parameter stability |
| CUSUMSQ Test | Structural stability |

The diagnostic results confirm that:

- Residuals are serially uncorrelated
- Volatility clustering is adequately modeled
- Estimated coefficients are stable across the sample period
- The models are econometrically robust

**Robustness Checks:** Several robustness checks were undertaken:

- Alternative oil price benchmarks (Brent and WTI)
- Alternative lag structures
- Alternative geopolitical risk measures
- Sub-sample estimations
- Alternative ordering in VAR systems

The principal findings remained statistically and economically consistent.

**Identification Strategy:** The identification framework isolates geopolitical shocks through:

- Strait-specific event dummy variables
- Recursive ordering in the VAR framework
- Structural decomposition of supply, demand, and geopolitical shocks

The ordering assumes that geopolitical shocks contemporaneously affect oil supply, demand, and prices, while oil market variables respond with lags.

**Limitations:** The study acknowledges the following limitations:

- Reliance on secondary data sources
- Potential measurement error in geopolitical risk indices
- Inability to fully capture informal geopolitical expectations
- Structural changes in global energy markets during the sample period

Nevertheless, the combined use of VAR/VECM and GARCH models provides a robust framework for understanding both equilibrium dynamics and volatility transmission mechanisms.

**Reproducibility Statement:** All procedures, transformations, and estimation techniques have been documented in sufficient detail to enable independent replication by editors, reviewers, and future researchers.

The supplied dataset and model specifications permit full verification of the principal empirical findings reported in the manuscript.
