# Supplementary material
Source: Research Square preprint supplement (doi:10.21203/rs.3.rs-9632764/v1)
Supplement: Supplementary file 2 [file 36f328501bde96a10022284e.xlsx]

## Sheet: Raw_Data
Date	OP_OilPrice_USD_Barrel	GPR_Index	SUP_mbd	DEM_mbd	Hormuz_Event_Dummy
2000-01-01	29.97	49.28	81.64	79.46	0
2000-02-01	23.85	56.23	80.2	78.5	0
2000-03-01	31.95	89.15	81.95	79.01	0
2000-04-01	40.93	85.96	82.75	81.34	0
2000-05-01	23.59	70.41	81.41	79.47	0
2000-06-01	23.83	74.1	83.67	79.29	0
2000-07-01	42.2	103.35	80.2	78.5	0
2000-08-01	34.31	56.85	80.2	80.71	0
2000-09-01	22.18	85.55	80.2	80.61	0
2000-10-01	32.53	67.05	83.39	83.42	0
2000-11-01	22.71	66.9	82.2	79.06	0
2000-12-01	22.92	100.04	81.21	80.08	0
2001-01-01	30.23	93.44	81.78	80.22	0
2001-02-01	22.15	93.38	80.2	82.69	0
2001-03-01	22.15	105.91	85.18	79.76	0
2001-04-01	22.89	74.04	81.77	80.52	0
2001-05-01	22.15	90.79	81.81	81.19	0
2001-06-01	32.12	66.22	82.81	80.51	0
2001-07-01	22.15	82.32	82.52	79.45	0
2001-08-01	22.15	71.19	82.2	80.69	0
2001-09-01	44.34	77.11	80.75	82.35	0
2001-10-01	27.66	89.8	82.72	78.65	0
2001-11-01	30.83	54.69	84.9	80.82	0
2001-12-01	22.15	127.69	84.17	79.4	0
2002-01-01	25.17	50.47	84.62	82.89	0
2002-02-01	31.96	45.5	81.53	78.5	0
2002-03-01	22.15	105.04	80.89	79.9	0
2002-04-01	35.08	96.11	82.25	81.66	0
2002-05-01	25.55	92.16	82.6	83.88	0
2002-06-01	28.87	92.5	84.23	81.03	0
2002-07-01	26.01	76.72	80.2	80.23	0
2002-08-01	50.78	54.83	85.02	84.7	0
2002-09-01	32.36	79.39	82.56	78.78	0
2002-10-01	22.15	60.8	82.23	78.5	0
2002-11-01	41.19	102.34	81.43	82.34	0
2002-12-01	22.15	74.52	80.53	80.73	0
2003-01-01	35.52	57.79	84.32	79.88	0
2003-02-01	22.15	70.63	83.27	83.07	0
2003-03-01	22.15	89.22	81.3	82.31	1
2003-04-01	36.1	65.04	81.36	80.94	0
2003-05-01	41.75	58.81	82.87	79.73	0
2003-06-01	36.31	85.69	85.95	83.69	0
2003-07-01	33.68	85.96	83.13	83.37	0
2003-08-01	32.06	67.39	81.34	82.1	0
2003-09-01	22.15	68.53	83.3	85.69	0
2003-10-01	28.34	86.34	83.33	80.52	0
2003-11-01	31.16	45.2	80.2	79.78	0
2003-12-01	46.57	45.82	83.8	81.36	0
2004-01-01	39.67	63.28	83.61	82.6	0
2004-02-01	22.15	76.14	85.07	83.2	0
2004-03-01	39.95	89.48	86.87	82.41	0
2004-04-01	33.09	118.82	85.86	83.56	0
2004-05-01	30.4	103.62	83.84	80.76	0
2004-06-01	43.52	78.41	82.65	85.69	0
2004-07-01	47.95	82.17	88.24	83.02	0
2004-08-01	47.19	57.81	84.54	85.26	0
2004-09-01	29.72	82.65	84.55	83.95	0
2004-10-01	35.25	76.13	84.56	84.24	0
2004-11-01	41.89	91.65	84.97	84.52	0
2004-12-01	48.57	63.13	84.53	84.38	0
2005-01-01	34.26	97.03	83.95	84.81	0
2005-02-01	37.42	122.6	84.07	86.13	0
2005-03-01	28.45	81.8	84.91	84.17	0
2005-04-01	27.79	94.79	84.21	85.18	0
2005-05-01	48.11	102.24	84.03	83.82	0
2005-06-01	53.78	75.19	85.33	86.65	0
2005-07-01	39.73	91.05	84.86	82.92	0
2005-08-01	50.72	86	87.57	87.46	0
2005-09-01	44.54	88.36	81.41	84.23	0
2005-10-01	34.7	66.83	87.1	81.81	0
2005-11-01	45	87	87.4	84.7	0
2005-12-01	57	99.07	82.5	83.32	0
2006-01-01	41.5	123.13	85.16	86.14	0
2006-02-01	57.74	111.07	85.19	83.53	0
2006-03-01	22.15	141.15	83.71	83.99	0
2006-04-01	50.78	68.37	84.73	81.47	0
2006-05-01	43.66	109.6	84.3	84.14	0
2006-06-01	40.04	92.61	88.67	80.67	0
2006-07-01	44.18	143.01	87.51	82.26	0
2006-08-01	23.62	68.29	88.09	86.56	0
2006-09-01	41.53	67.74	87.34	86.69	0
2006-10-01	47.53	73.98	84.63	86.12	0
2006-11-01	58.98	45.2	85.61	83.7	0
2006-12-01	39.25	76.29	87.2	85.43	0
2007-01-01	36.58	70.69	84.71	85.59	0
2007-02-01	39.88	93.66	87.68	83.59	0
2007-03-01	54.29	98.68	86.32	88.47	0
2007-04-01	48.66	137.27	86.19	87.42	0
2007-05-01	40.3	114.36	87.89	85.52	0
2007-06-01	50.97	76.41	87.57	86.05	0
2007-07-01	47.04	68.61	86.43	86.46	0
2007-08-01	55.99	103.6	88.78	82.49	0
2007-09-01	39.52	58.53	85.49	85.8	0
2007-10-01	43.5	137.56	88.11	85.1	0
2007-11-01	43.09	121.49	88.15	84.61	0
2007-12-01	32.61	80.51	86.87	85.98	0
2008-01-01	50.44	49.65	87.89	89.81	0
2008-02-01	50.32	126.56	85.6	87.8	0
2008-03-01	47.99	90.08	88.93	85.7	0
2008-04-01	45.83	124.12	87.34	87.84	0
2008-05-01	34.26	53.55	86.91	89.41	0
2008-06-01	44.44	78.66	89.34	88.64	0
2008-07-01	45.45	94.01	86.78	87.16	1
2008-08-01	41.09	95.29	85.79	85.97	0
2008-09-01	47.73	83.1	85.64	88.47	0
2008-10-01	53.62	110.15	88.96	88.01	0
2008-11-01	68.68	68.13	86.2	88.99	0
2008-12-01	51.8	91.49	90.83	88.6	0
2009-01-01	52.86	98.29	85.14	89.43	0
2009-02-01	49.77	108.38	90.88	86.66	0
2009-03-01	31.56	113.54	88.73	90.07	0
2009-04-01	50.72	67.87	88.34	88.14	0
2009-05-01	51.82	57.87	87.74	91.6	0
2009-06-01	76.09	128.4	89.22	86.71	0
2009-07-01	49.77	105	88.64	91.15	0
2009-08-01	54.94	78.21	90.42	88.46	0
2009-09-01	51.81	135.94	89.01	87.02	0
2009-10-01	40.7	100.28	89.14	87.4	0
2009-11-01	64.05	127.11	88.44	87.77	0
2009-12-01	60.38	99.55	88.97	89.19	0
2010-01-01	61	149.61	89.59	89.45	0
2010-02-01	44.23	142.21	86.64	87.56	0
2010-03-01	67.59	92.34	87.25	88.63	0
2010-04-01	39.78	123.09	90.46	92.61	0
2010-05-01	59.9	115.16	89.67	91.95	0
2010-06-01	76.17	133.48	89.21	89.7	0
2010-07-01	44.59	75.38	89.59	89.07	0
2010-08-01	49.07	116.88	90.15	89.29	0
2010-09-01	55.96	126.43	88.89	90.26	0
2010-10-01	50.17	56.23	88.61	87.4	0
2010-11-01	39.93	70.85	90.14	88.86	0
2010-12-01	56.35	49.69	88.45	86.4	0
2011-01-01	45.28	94.17	90.6	90.2	0
2011-02-01	60.87	119.08	87.51	90.73	0
2011-03-01	47.18	138.93	91.68	88.78	0
2011-04-01	72.1	103.46	90.92	92.56	0
2011-05-01	49.01	142.55	90.66	87.6	0
2011-06-01	53.85	67.57	91.83	87.25	0
2011-07-01	65.44	59.72	92.92	90.37	0
2011-08-01	45.23	101.15	92.02	91.93	0
2011-09-01	60.05	112.38	87.81	93.16	0
2011-10-01	71.08	102.19	88.72	89.39	0
2011-11-01	42.17	51.56	89.77	92.23	0
2011-12-01	60.32	101.25	90.82	90.3	1
2012-01-01	61.31	71.1	91.63	90.14	0
2012-02-01	66.76	120.69	89.84	92.13	0
2012-03-01	46.81	113.35	91.28	91.79	0
2012-04-01	46.21	80.92	89.94	87.86	0
2012-05-01	64.87	91.8	90.22	93.44	0
2012-06-01	62.85	78.4	89.1	93.34	0
2012-07-01	62.62	103.55	89.9	89.81	0
2012-08-01	63.82	129.23	89.33	91.73	0
2012-09-01	53.79	80.94	89.97	91.99	0
2012-10-01	63.14	118.42	93.08	91.65	0
2012-11-01	63.98	92.8	90.15	90.27	0
2012-12-01	54.14	86.47	95.59	90.14	0
2013-01-01	80.18	103.85	92.46	91.38	0
2013-02-01	66.49	80.87	92.07	93.62	0
2013-03-01	50.08	93.15	90.57	92.57	0
2013-04-01	68.79	77.28	92.98	91	0
2013-05-01	52.71	156.58	91.14	93.14	0
2013-06-01	70.56	108.57	92.26	86.7	0
2013-07-01	74.51	90.43	95.99	93.98	0
2013-08-01	54.95	113.51	92.08	88.86	0
2013-09-01	73.03	105.59	94.02	91.42	0
2013-10-01	67.76	103.1	91.31	90.14	0
2013-11-01	72.08	124.22	92.38	89.91	0
2013-12-01	83.06	128.03	95.16	94.41	0
2014-01-01	61.88	96.07	91.64	91.56	0
2014-02-01	57.03	95.17	95.37	93.1	0
2014-03-01	55.9	102.92	93.79	92.47	0
2014-04-01	56.88	52.49	91.95	93.5	0
2014-05-01	64.5	72.39	93.82	92.86	0
2014-06-01	68.91	144.67	94.4	90.49	0
2014-07-01	68.5	151.86	93.94	94.68	0
2014-08-01	74.24	104.74	90.73	92.08	0
2014-09-01	66.33	125.62	92.06	90.24	0
2014-10-01	80.97	119.22	92.86	92.36	0
2014-11-01	64.03	188.64	93.19	95.91	0
2014-12-01	94.11	139.9	94.3	94.82	0
2015-01-01	73.4	108.94	93.71	92.74	0
2015-02-01	58.8	88.49	91.51	92.82	0
2015-03-01	56.9	72.45	94.16	92.95	0
2015-04-01	72.67	117.93	94.57	97.35	0
2015-05-01	65.84	94.17	94.57	94.38	0
2015-06-01	75.45	77.75	95.42	94.55	0
2015-07-01	73.28	97.38	95.13	95.71	0
2015-08-01	68.05	86.74	94.64	94.36	0
2015-09-01	60.55	156.19	93.91	93.55	0
2015-10-01	54.1	136.29	91.6	93.74	0
2015-11-01	65.02	114.28	94.81	94.05	0
2015-12-01	78.28	151.71	94.55	94.19	0
2016-01-01	72.09	116.88	94.71	95.65	0
2016-02-01	57.73	93.65	92.46	94.51	0
2016-03-01	72.15	153.5	92.83	95.82	0
2016-04-01	74.51	129.12	96.1	94.44	0
2016-05-01	62.05	89.96	94.53	94.81	0
2016-06-01	72.66	111.36	95.69	91.15	0
2016-07-01	71.94	94.46	94.78	96.47	0
2016-08-01	60.16	82.02	94.85	95.53	0
2016-09-01	75.4	139.98	96.29	96.78	0
2016-10-01	77.66	164.79	94.18	89.85	0
2016-11-01	83.12	82.33	95.17	98.91	0
2016-12-01	83.06	131.6	94.4	94.98	0
2017-01-01	58.98	101.49	94.52	97.31	0
2017-02-01	63.62	105.82	94.78	93.52	0
2017-03-01	78.38	103.42	95.65	96.58	0
2017-04-01	78.6	96.86	94.67	93.66	0
2017-05-01	78.85	119.91	97.34	94.51	0
2017-06-01	112.46	98.16	94.19	99.16	0
2017-07-01	79.87	125.93	95.32	95.45	0
2017-08-01	85.75	118.14	95.01	96.27	0
2017-09-01	84.17	113.66	97.91	97.52	0
2017-10-01	81.38	97.18	96.11	96.93	0
2017-11-01	71.95	105.68	97.44	96.39	0
2017-12-01	82.92	139.22	93.73	96.86	0
2018-01-01	67.84	133.09	96.43	100.61	0
2018-02-01	73.43	96.36	97.44	96.26	0
2018-03-01	71.18	123.52	96.3	96.81	0
2018-04-01	77.09	140.06	97.85	98.42	0
2018-05-01	99.65	79.77	95.54	98.6	0
2018-06-01	58.07	135.32	98.51	98.82	0
2018-07-01	83.84	105.41	99.91	97.92	0
2018-08-01	61.08	136.47	95.99	94.79	0
2018-09-01	72.72	103.36	95.94	99.87	0
2018-10-01	88.57	77.55	98.86	94.95	0
2018-11-01	78.55	82.22	99.12	97.64	0
2018-12-01	67.37	124.35	96.04	95.81	0
2019-01-01	71.22	129.87	96.26	97.14	0
2019-02-01	85.41	101	96.54	97.93	0
2019-03-01	71.54	139.81	95.02	97.99	0
2019-04-01	81.24	82.54	95.73	98.26	0
2019-05-01	79.77	122.66	95.68	100.48	0
2019-06-01	73.03	94.27	96.1	98.47	1
2019-07-01	101.22	108.49	97.27	97.3	0
2019-08-01	86.36	126.2	97.75	99.56	0
2019-09-01	60	103.74	99.8	100.04	0
2019-10-01	82.35	115.87	96.04	95.77	0
2019-11-01	74.1	150.88	99.09	99.14	0
2019-12-01	89.48	111.53	97.36	99.41	0
2020-01-01	73.26	147.08	97.68	97.69	1
2020-02-01	80.27	98.18	98.84	100.78	0
2020-03-01	86.71	139.9	96.22	98.12	0
2020-04-01	90.55	162.93	98.55	98.69	0
2020-05-01	70.12	65.33	98.29	98.24	0
2020-06-01	79.01	107.44	98.86	98.66	0
2020-07-01	77.84	142.02	98.62	96.74	0
2020-08-01	76.29	122.75	101.94	96.2	0
2020-09-01	100.71	137.34	97.38	101.74	0
2020-10-01	87.34	113.19	97.61	97.43	0
2020-11-01	70.92	130.69	97.54	97.25	0
2020-12-01	92.94	124.87	97.72	95.24	0
2021-01-01	105.22	158.19	97.66	98.05	0
2021-02-01	94.56	135.59	100.48	96.9	0
2021-03-01	69.27	137.9	100.89	102.31	0
2021-04-01	79.86	119.4	97.98	101.26	0
2021-05-01	97.6	117.74	97.66	98.28	0
2021-06-01	78.09	119.35	99.69	103.2	0
2021-07-01	89.84	140.26	98.22	101.45	0
2021-08-01	93.38	120.11	100.07	99.18	0
2021-09-01	76.6	138.11	99.5	95.34	0
2021-10-01	85.51	182.99	96.99	103.2	0
2021-11-01	53.93	153.12	101.66	97.5	0
2021-12-01	76.33	123.42	102.11	97.12	0
2022-01-01	84.28	161.84	98.56	102.01	0
2022-02-01	74.56	121.84	98.97	103.2	0
2022-03-01	103.6	81.32	100.06	102.82	0
2022-04-01	73.21	107.31	100.2	101.43	0
2022-05-01	83.34	85.97	100.76	101.56	0
2022-06-01	89.28	124.19	102.4	102.11	0
2022-07-01	102.62	133.67	99.65	102.02	0
2022-08-01	74.09	175.36	98.79	101.24	0
2022-09-01	100.31	141.85	97.99	101	0
2022-10-01	89.02	128.44	99.03	100.78	0
2022-11-01	79.33	154.88	100.15	99.62	0
2022-12-01	94	79.1	102.4	100.55	0
2023-01-01	91.61	140.51	99.57	98.09	0
2023-02-01	83.85	154.12	100.75	101.04	0
2023-03-01	90.78	98.12	100.47	99.52	0
2023-04-01	86.46	163.91	102.34	99.39	0
2023-05-01	91.69	144.01	102.4	101.79	0
2023-06-01	97.41	125.4	99.91	103.2	0
2023-07-01	106.88	151.84	100.04	103.2	0
2023-08-01	78.88	193.02	102.4	98.88	0
2023-09-01	112.82	141.03	101.94	100	0
2023-10-01	72.2	142.93	102.4	103.2	0
2023-11-01	90.44	125.47	101.94	100.18	0
2023-12-01	98.07	115.94	100.6	101.62	0
2024-01-01	95.23	158.18	102.1	103.1	0
2024-02-01	86.43	116.26	102.4	100.45	0
2024-03-01	90.81	139.68	102.4	102.46	0
2024-04-01	88.2	126.19	102.19	99.95	1
2024-05-01	87.47	150.34	102.4	101.35	0
2024-06-01	102.09	146.94	102.4	103.09	0
2024-07-01	97.4	164.77	102.4	99.73	0
2024-08-01	87.13	126.31	102.4	103.2	0
2024-09-01	103.29	132.55	101.53	102.72	0
2024-10-01	97.6	115.06	102.08	103.2	0
2024-11-01	102.89	128.66	102.4	103.2	0
2024-12-01	101.3	149.43	100.77	103.2	0

## Sheet: Notes
Information
This is a reconstructed monthly dataset based on the methodology and reported statistics from the paper.
The original private raw dataset used by the authors is not included in the manuscript.
Variables included: OP, GPR, SUP, DEM, and Hormuz event dummy.
Time period: January 2000 - December 2024.
Dataset prepared for econometric replication (VAR/VECM/GARCH).
